# Supplementary material
Source: PubMed Central journal article supplement (PMC2930734)
Supplement: supp_M110.140038_jbc.M110.140038-1.pdf [file supp_M110.140038_jbc.M110.140038-1.pdf]

## SUPPLEMENTARY DATA

### STRUCTURE AND MUTAGENESIS OF NEURAL CELL ADHESION MOLECULE DOMAINS: EVIDENCE FOR FLEXIBILITY IN THE PLACEMENT OF POLYSIALIC ACID ATTACHMENT SITES.

Deirdre A. Foley, Kristin G. Swartzentruber, Arnon Lavie, and Karen J. Colley

#### SUPPLEMENTAL EXPERIMENTAL PROCEDURES

*Analytical Ultracentrifugation of purified Ig5-FN1*-Ig5-FN1 purified from *Escherichia coli* was dialyzed in 50 mM Tris, pH 8.0, 250 mM NaCl. Sedimentation velocity experiments were performed at the Center for Structural Biology at University of Illinois at Chicago. Briefly, 400  $\mu$ l of protein sample, ranging from 0.15 mg/ml to 1.5 mg/ml, was loaded into Epon double-sector centerpieces and centrifuged at 50,000 rpm in a Beckman ProteomeLab XL-1 centrifuge using an An-60 Ti rotor. Sedimentation was monitored by measuring absorbance at 280 nm. Buffer density and viscosity were determined using the program SEDNTERP (1) and data analyzed with the program SEDFIT (2).

*Immunofluorescence analysis of NCAM localization*-Cos-1 cells grown on 12-mm coverslips were transfected using 3  $\mu$ l Lipofectin in 300  $\mu$ l Opti-MEM 1, and 0.5  $\mu$ g NCAM cDNA. After a 6 h incubation, 1 ml DMEM, 10% FBS, was added to each well. Sixteen hours later, cell media was removed and cells were washed twice with 1 ml PBS. One milliliter of -20°C methanol was used to permeabilize cells to visualize both internal and cell surface structures. The coverslips were then incubated with 1 ml immunofluorescence blocking buffer (5% normal goat serum in PBS). To evaluate localization, cells were incubated with anti-V5 tag antibody diluted 1:250 in blocking buffer, washed with PBS four times for 5 min, followed by incubation with fluorescence isothiocyanate-conjugated goat anti-mouse IgG (Jackson ImmunoResearch) diluted 1:100 in blocking buffer. After further washing, coverslips were mounted on glass slides using mounting medium (15% (w/v) Vinol 205 polyvinyl alcohol, 33% (w/v) glycerol, 0.1% azide in PBS, pH 8.5). A Nikon Axiophot microscope equipped with epifluorescence illumination and a 60X oil immersion Plan Apochromat objective was used to visualize the cells and pictures taken with a SPOT RT color digital camera and processed with SPOT RT software version 3.5.1 (Diagnostic Instruments Inc, Sterling Heights, MI).

#### SUPPLEMENTAL FIGURE LEGENDS

**FIGURE 1. Analytical ultracentrifugation analysis of bacterially-expressed Ig5-FN1 indicates concentration-dependent dimer formation.** Sedimentation velocity analysis of purified Ig5-FN1 at a concentration of 0.15 mg/ml (blue) and 0.8 mg/ml (pink) using a 50 mM Tris, pH 8.0, 250 mM NaCl buffer.

**FIGURE 2. NCAM proteins containing engineered N-linked glycosylation sites localize to the Golgi and cell surface.** Cos-1 cells transiently expressing NCAM or various mutants were fixed with methanol and subcellular localization determined by indirect immunofluorescence microscopy using the anti-V5 epitope tag antibody. *Bar*, 10  $\mu$ m.

#### SUPPLEMENTAL REFERENCES

1. Hayes, D., Laue, T., and Philo J. <http://www.rasmb.bbri.org>
2. Schuck, P. Biophys. J. (2000) **78**, 1606-1619

**Supplemental Table 1:** List of primers used for site-directed mutagenesis of NCAM and Ig5-FN1

| MUTANT                    | TEMPLATE               | PRIMER     | PRIMER SEQUENCE                                   |
|---------------------------|------------------------|------------|---------------------------------------------------|
| Ig5-FN1<br>Asn[5.6]Gln    | Ig5-FN1                | N449Q      | 5'-GCCAAGCTCCCAGTACAGCAATATCAAG-3'                |
|                           | Ig5-FN1<br>Asn[5]Gln   | N478Q      | 5'-CTTGATATTGCTGTACTGGGAGCTTGGC-3'                |
|                           |                        |            | 5'-GGGAAC TACCAATGTACTGCAGTGAAC-3'                |
|                           |                        |            | 5'-GTTCACTGCAGTACATTGGTAGTTCCC-3'                 |
| Ig5-FN1<br>Asn[4.5.6]Gln  | Ig5-FN1<br>Asn[5.6]Gln | N423Q      | 5'-GGAACCAGGTGCAAATCACCTGCGAG-3'                  |
|                           |                        |            | 5'-CTCGCAGGTGATTGTCACCTGGTTCC-3'                  |
| mut[5.6]NXA               | NCAM                   | S451A      | 5'-CAAGCTCCAATTACGCCAATATCAAGATC-3'               |
|                           | NCAM<br>Asn[5]NXA      | T480A      | 5'-GATCTTGATATTGGCGTAATTGGAGCTTG-3'               |
|                           |                        |            | 5'-GGGAAC TACAAC TGTGCTGCAGTGAACCGC-3'            |
|                           |                        |            | 5'-GCGGTTCACTGCAGCACAGTTGTAGTTCCC-3'              |
| sNCAM mut4                | sNCAM                  | T425A      | 5'-GAACCAGGTGAACATCGCCTGCGAGGTATTG-3'             |
| sIg5-FN1 mut4             | sIg5-FN1               |            | 5'-CAAATACCTCGCAGGCGATGTTACCTGGTTC-3'             |
| mut[5.6]NXA<br>E465N      | mut[5.6]NXA            | E465N      | 5'-CTGCCAGCTATCTGAACGTGACCCCAGACTC-3'             |
|                           |                        |            | 5'-GAGTCTGGGGTCACGTTCAAGATAGCTGGCAG'-3'           |
| mut[5.6]NXA<br>Q443LL-NLS | mut[5.6]NXA            | Q443LL-NLS | 5'-CATGGTTTCGGGATGGCAACCTGTGCGCAAGCTCCAATTACG-3'  |
|                           |                        |            | 5'-CGTAATTGGAGCTTGGCGACAGGTTGCCATCCCGAAACCATG-3'  |
| mut[5.6]NXA<br>N452IK-NIS | mut[5.6]NXA            | N452IK-NIS | 5'-CAATTACGCCAATATCTCGATCTACAACACCCCC-3'          |
|                           |                        |            | 5'-GGGGGTGTTGTAGATCGAGATATTGGCGTAATTG-3'          |
| mut[5.6]NXA<br>F439RD-NRS | mut[5.6]NXA            | F439RD-NRS | 5'-GTGCCACGATCTCATGGAATCGGTCTGGCCAGCTGCTGCCAAG-3' |
|                           |                        |            | 5'-CTTGGCAGCAGCTGGCCAGACCGATTCCATGAGATCGTGGCAC-3' |
| mut[5.6]NXA<br>Q487N      | mut[5.6]NXA            | Q487N      | 5'-GTGAACCGCATTGGGAACGAGTCCTTGGAATTC-3'           |
|                           |                        |            | 5'-GAATTC AAGGACTCGTTCCCAATGCGGTTACAC-3'          |
| mut[5.6]NXA<br>E491FI-NFT | mut[5.6]NXA            | E491FI-NFT | 5'-GGGCAGGAGTCCTTGAACCTTACCCTTGTTC AAGCAGAC-3'    |
|                           |                        |            | 5'-GTCTGCTTGAACAAGGGTGAAGTTCAAGGACTCCTGCCC-3'     |

## Interference Fits

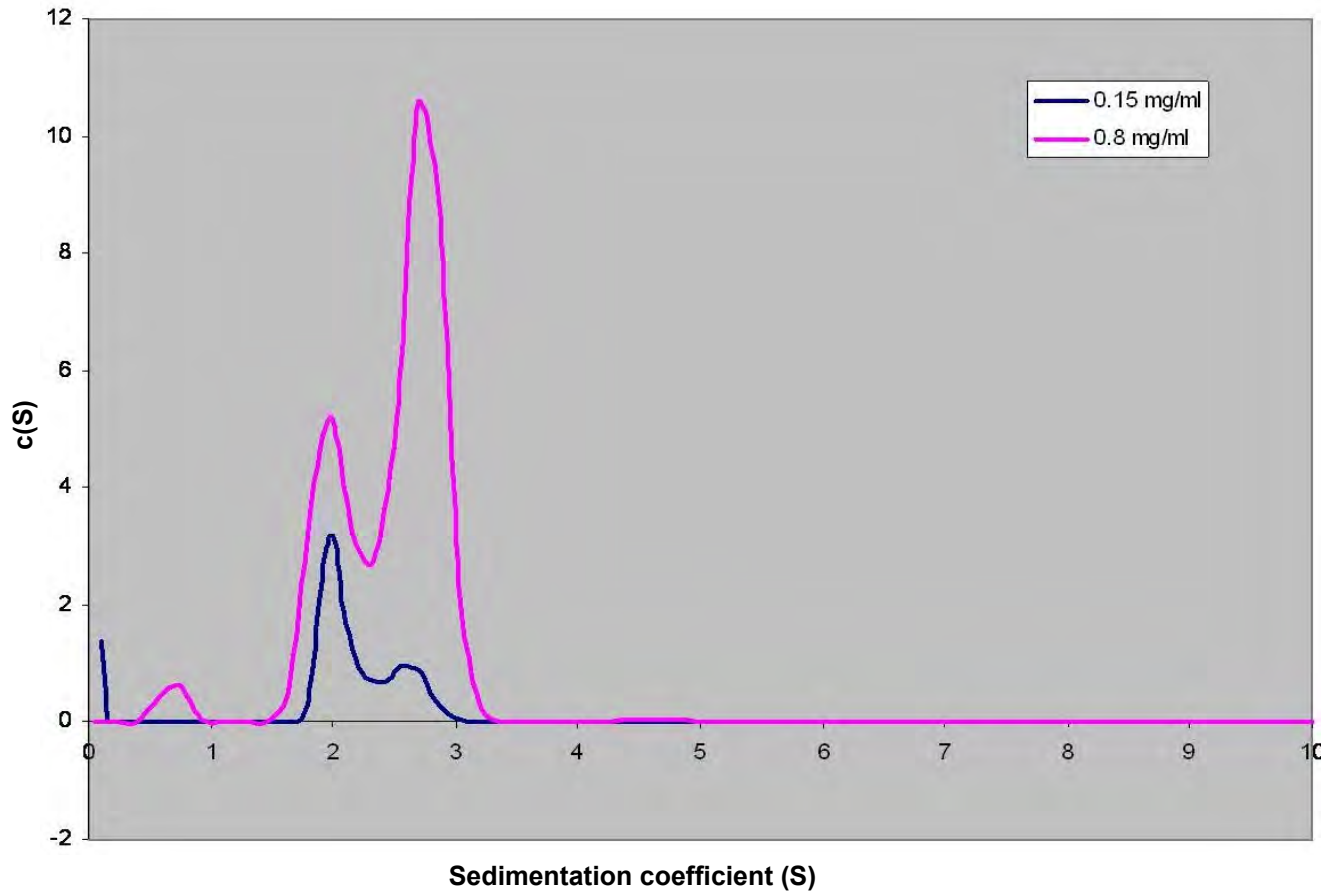

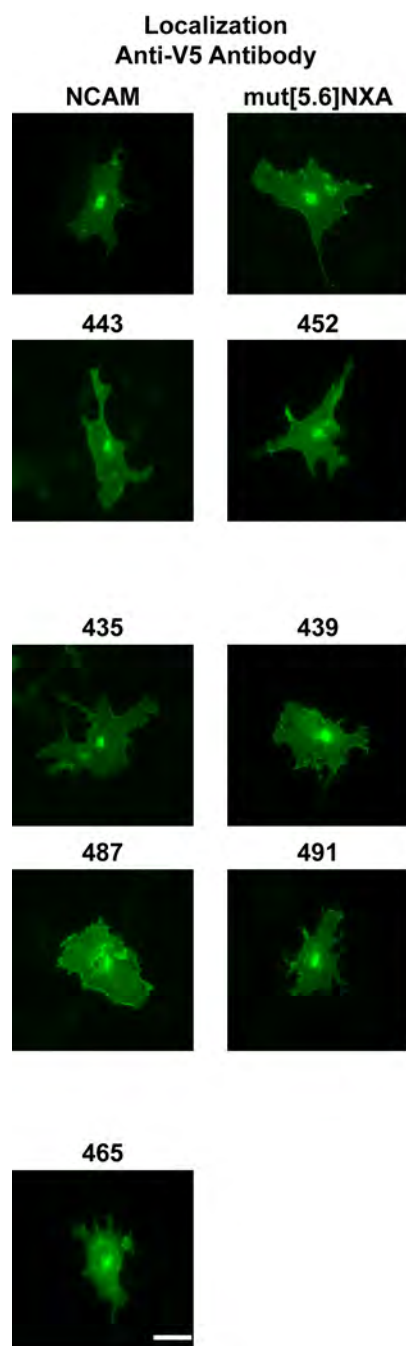

**Supplemental Figure 2**
